# Supplementary material for: (R)Evolution of Refrigerants
Source: PubMed Central journal article supplement (PMC8739722; doi:10.1021/acs.jced.0c00338), 2020
Supplement: NIHMS1642330-supplement-Supp1.pdf [file NIHMS1642330-supplement-Supp1.pdf]

## SUPPORTING INFORMATION

### (R)Evolution of Refrigerants

Mark O. McLinden<sup>†</sup> and Marcia L. Huber

*Applied Chemicals and Materials Division, National Institute of Standards and Technology  
325 Broadway, Boulder, Colorado 80305 USA*

**Table S1.** Pure-fluid refrigerants in REFPROP version 10.0 and sources of property formulations. Values for  $T_{\text{NBP}}$  and  $T_c$  are computed from the cited EOS.

| ASHRAE designation    | Chemical name                          | CAS number | Property Sources                                                                                                                                                                          | $T_{\text{NBP}}/K$ | $T_c/K$ |
|-----------------------|----------------------------------------|------------|-------------------------------------------------------------------------------------------------------------------------------------------------------------------------------------------|--------------------|---------|
| <b>CFCs</b>           |                                        |            |                                                                                                                                                                                           |                    |         |
| R-11                  | Trichlorofluoromethane                 | 75-69-4    | EOS: Jacobsen et al. (1992) <sup>1</sup><br>$\sigma$ : Mulero et al. (2012) <sup>2</sup><br>$\lambda$ : McLinden et al. (2000) <sup>3</sup><br>$\eta$ : Klein et al. (1997) <sup>4</sup>  | 296.86             | 471.11  |
| R-12                  | Dichlorodifluoromethane                | 75-71-8    | EOS: Marx et al. (1992) <sup>5</sup><br>$\sigma$ : Mulero et al. (2012) <sup>2</sup><br>$\lambda$ : McLinden et al. (2000) <sup>3</sup><br>$\eta$ : Klein et al. (1997) <sup>4</sup>      | 243.40             | 385.12  |
| R-13                  | Chlorotrifluoromethane                 | 75-72-9    | EOS: Magee et al. (2000) <sup>6</sup><br>$\sigma$ : Mulero et al. (2012) <sup>2</sup><br>$\lambda$ : Huber et al. (2003) <sup>7,*</sup><br>$\eta$ : Huber et al. (2003) <sup>7,*</sup>    | 191.67             | 302.00  |
| R-113                 | 1,1,2-Trichloro-1,2,2-trifluoroethane  | 76-13-1    | EOS: Marx et al. (1992) <sup>5</sup><br>$\sigma$ : Mulero et al. (2012) <sup>2</sup><br>$\lambda$ : Huber et al. (2003) <sup>7,*</sup><br>$\eta$ : Huber et al. (2003) <sup>7,*</sup>     | 320.74             | 487.21  |
| R-114                 | 1,2-Dichloro-1,1,2,2-tetrafluoroethane | 76-14-2    | EOS: Platzer et al. (1990) <sup>8</sup><br>$\sigma$ : Mulero et al. (2012) <sup>2</sup><br>$\lambda$ : Huber (2018) <sup>9</sup><br>$\eta$ : Huber (2018) <sup>9</sup>                    | 276.74             | 418.83  |
| R-115                 | Chloropentafluoroethane                | 76-15-3    | EOS: Lemmon and Span(2015) <sup>10</sup><br>$\sigma$ : Mulero et al. (2012) <sup>2</sup><br>$\lambda$ : Huber et al. (2003) <sup>7,*</sup><br>$\eta$ : Huber et al. (2003) <sup>7,*</sup> | 233.93             | 353.10  |
| <b>HCFCs and HCCs</b> |                                        |            |                                                                                                                                                                                           |                    |         |
| R-21                  | Dichlorofluoromethane                  | 75-43-4    | EOS: Platzer et al. (1990) <sup>8</sup><br>$\sigma$ : Mulero et al. (2012) <sup>2</sup><br>$\lambda$ : Huber et al. (2003) <sup>7,*</sup><br>$\eta$ : Huber et al. (2003) <sup>7,*</sup>  | 282.01             | 451.48  |
| R-22                  | Chlorodifluoromethane                  | 75-45-6    | EOS: Kamei et al. (1995) <sup>11</sup><br>$\sigma$ : Mulero et al. (2012) <sup>2</sup><br>$\lambda$ : McLinden et al. (2000) <sup>3</sup><br>$\eta$ : Klein et al. (1997) <sup>4</sup>    | 232.34             | 369.30  |

<sup>†</sup> markm@boulder.nist.gov

| ASHRAE designation | Chemical name                      | CAS number | Property Sources                                                                                                                                                                                        | $T_{NBP}/K$ | $T_c/K$ |
|--------------------|------------------------------------|------------|---------------------------------------------------------------------------------------------------------------------------------------------------------------------------------------------------------|-------------|---------|
| R-40               | Methyl chloride                    | 74-87-3    | EOS: Thol et al. (2014) <sup>12</sup><br>$\sigma$ : Mulero and Cachadiña (2014) <sup>13</sup><br>$\lambda$ : Huber (2018) <sup>9</sup><br>$\eta$ : Huber (2018) <sup>9</sup>                            | 249.17      | 416.30  |
| R-123              | 2,2-Dichloro-1,1,1-trifluoroethane | 306-83-2   | EOS: Younglove and McLinden (1994) <sup>14</sup><br>$\sigma$ : Mulero et al. (2012) <sup>2</sup><br>$\lambda$ : Laesecke et al. (1996) <sup>15</sup><br>$\eta$ : Tanaka and Sotari (1995) <sup>16</sup> | 300.97      | 456.83  |
| R-124              | 1-Chloro-1,2,2,2-tetrafluoroethane | 2837-89-0  | EOS: de Vries et al. (1995) <sup>17</sup><br>$\sigma$ : Mulero et al. (2012) <sup>2</sup><br>$\lambda$ : Huber et al. (2003) <sup>7,*</sup><br>$\eta$ : Huber et al. (2003) <sup>7,*</sup>              | 261.19      | 395.43  |
| R-141b             | 1,1-Dichloro-1-fluoroethane        | 1717-00-6  | EOS: Lemmon and Span (2006) <sup>18</sup><br>$\sigma$ : Mulero et al. (2012) <sup>2</sup><br>$\lambda$ : Huber et al. (2003) <sup>7,*</sup><br>$\eta$ : Huber et al. (2003) <sup>7,*</sup>              | 305.20      | 477.50  |
| R-142b             | 1-Chloro-1,1-difluoroethane        | 75-68-3    | EOS: Lemmon and Span (2006) <sup>18</sup><br>$\sigma$ : Mulero et al. (2012) <sup>2</sup><br>$\lambda$ : Huber et al. (2003) <sup>7,*</sup><br>$\eta$ : Huber et al. (2003) <sup>7,*</sup>              | 264.03      | 410.26  |
| R-150              | 1,2-Dichloroethane                 | 107-06-2   | EOS: Thol et al. (2017) <sup>19</sup><br>$\sigma$ : Huber (2018) <sup>9</sup><br>$\lambda$ : Huber (2018) <sup>9</sup><br>$\eta$ : Huber (2018) <sup>9</sup>                                            | 356.65      | 561.60  |
| <b>HFCs</b>        |                                    |            |                                                                                                                                                                                                         |             |         |
| R-14               | Tetrafluoromethane                 | 75-73-0    | EOS: Platzer et al. (1990) <sup>8</sup><br>$\sigma$ : Mulero et al. (2012) <sup>2</sup><br>$\lambda$ : Huber et al. (2003) <sup>7,*</sup><br>$\eta$ : Huber et al. (2003) <sup>7,*</sup>                | 145.10      | 227.51  |
| R-23               | Trifluoromethane                   | 75-46-7    | EOS: Penoncello et al. (2003) <sup>20</sup><br>$\sigma$ : Mulero et al. (2012) <sup>2</sup><br>$\lambda$ : Shan et al. (2000) <sup>21</sup><br>$\eta$ : Shan et al. (2000) <sup>21</sup>                | 191.13      | 299.29  |
| R-32               | Difluoromethane                    | 75-10-5    | EOS: Tillner-Roth and Yokozeki (1997) <sup>22</sup><br>$\sigma$ : Mulero et al. (2012) <sup>2</sup><br>$\lambda$ : Huber et al. (2003) <sup>7,*</sup><br>$\eta$ : Huber et al. (2003) <sup>7,*</sup>    | 221.50      | 351.26  |
| R-41               | Fluoromethane                      | 593-53-3   | EOS: : Lemmon and Span (2006) <sup>18</sup><br>$\sigma$ : : Lemmon and Span (2006) <sup>18</sup><br>$\lambda$ : McLinden et al. (2000) <sup>3</sup><br>$\eta$ : Klein et al. (1997) <sup>4</sup>        | 194.84      | 317.28  |
| R-116              | Hexafluoroethane                   | 76-16-4    | EOS: Lemmon and Span (2006) <sup>18</sup><br>$\sigma$ : Mulero et al. (2012) <sup>2</sup><br>$\lambda$ : Huber et al. (2003) <sup>7,*</sup><br>$\eta$ : Huber et al. (2003) <sup>7,*</sup>              | 195.06      | 293.03  |
| R-125              | Pentafluoroethane                  | 354-33-6   | EOS: Lemmon and Jacobsen (2005) <sup>23</sup><br>$\sigma$ : Mulero et al. (2012) <sup>2</sup><br>$\lambda$ : Perkins and Huber (2006) <sup>24</sup><br>$\eta$ : Huber and Laesecke (2006) <sup>25</sup> | 225.06      | 339.17  |

| ASHRAE designation | Chemical name                    | CAS number | Property Sources                                                                                                                                                                                 | $T_{NBP}/K$ | $T_c/K$ |
|--------------------|----------------------------------|------------|--------------------------------------------------------------------------------------------------------------------------------------------------------------------------------------------------|-------------|---------|
| R-134a             | 1,1,1,2-Tetrafluoroethane        | 811-97-2   | EOS: Tillner-Roth and Baehr (1994) <sup>26</sup><br>$\sigma$ : Mulero et al. (2012) <sup>2</sup><br>$\lambda$ : Huber et al. (2003) <sup>7</sup><br>$\eta$ : Perkins et al. (2000) <sup>27</sup> | 247.08      | 374.21  |
| R-143a             | 1,1,1-Trifluoroethane            | 420-46-2   | EOS: Lemmon and Jacobsen (2000) <sup>28</sup><br>$\sigma$ : Mulero and Cachadiña (2014) <sup>13</sup><br>$\lambda$ : Huber (2018) <sup>9</sup><br>$\eta$ : Huber (2018) <sup>9</sup>             | 225.91      | 345.86  |
| R-152a             | 1,1-Difluoroethane               | 75-37-6    | EOS: Outcalt and McLinden (1996) <sup>29</sup><br>$\sigma$ : Mulero et al. (2012) <sup>2</sup><br>$\lambda$ : Krauss et al. (1996) <sup>30</sup><br>$\eta$ : Klein et al. (2000) <sup>4</sup>    | 249.13      | 386.41  |
| R-161              | Fluoroethane                     | 353-36-6   | EOS: Qi et al. (2016) <sup>31</sup><br>$\sigma$ : Mulero et al. (2012) <sup>2</sup><br>$\lambda$ : Tsolakidou et al. (2017) <sup>32</sup><br>$\eta$ : Tsolakidou et al. (2017) <sup>32</sup>     | 235.61      | 375.25  |
| R-218              | Octafluoropropane                | 76-19-7    | EOS: Lemmon and Span (2006) <sup>18</sup><br>$\sigma$ : Mulero et al. (2012) <sup>2</sup><br>$\lambda$ : Huber (2018) <sup>9</sup><br>$\eta$ : Huber (2018) <sup>9</sup>                         | 236.36      | 345.02  |
| R-227ea            | 1,1,1,2,3,3,3-Heptafluoropropane | 431-89-0   | EOS: Lemmon and Span (2015) <sup>10</sup><br>$\sigma$ : Mulero et al. (2012) <sup>2</sup><br>$\lambda$ : Huber et al. (2003) <sup>7,*</sup><br>$\eta$ : Huber et al. (2003) <sup>7,*</sup>       | 256.81      | 374.90  |
| R-236ea            | 1,1,1,2,3,3-Hexafluoropropane    | 431-63-0   | EOS: Rui et al. (2013) <sup>33</sup><br>$\sigma$ : Mulero et al. (2012) <sup>2</sup><br>$\lambda$ : Huber (2018) <sup>9</sup><br>$\eta$ : Huber (2018) <sup>9</sup>                              | 279.32      | 412.44  |
| R-236fa            | 1,1,1,3,3,3-Hexafluoropropane    | 690-39-1   | EOS: Pan et al. (2012) <sup>34</sup><br>$\sigma$ : Mulero et al. (2012) <sup>2</sup><br>$\lambda$ : Huber (2018) <sup>9</sup><br>$\eta$ : Huber (2018) <sup>9</sup>                              | 271.66      | 398.07  |
| R-245ca            | 1,1,2,2,3-Pentafluoropropane     | 679-86-7   | EOS: Zhou and Lemmon (2016) <sup>35</sup><br>$\sigma$ : Mulero et al. (2012) <sup>2</sup><br>$\lambda$ : Huber (2018) <sup>9</sup><br>$\eta$ : Huber (2018) <sup>9</sup>                         | 298.41      | 447.57  |
| R-245fa            | 1,1,1,3,3-Pentafluoropropane     | 460-73-1   | EOS: Akasaka et al. (2015) <sup>36</sup><br>$\sigma$ : Mulero et al. (2012) <sup>2</sup><br>$\lambda$ : Perkins et al. (2016) <sup>37</sup><br>$\eta$ : Perkins et al. (2016) <sup>37</sup>      | 288.20      | 427.01  |
| R-365mfc           | 1,1,1,3,3-Pentafluorobutane      | 406-58-6   | EOS: Lemmon and Span (2015) <sup>10</sup><br>$\sigma$ : Mulero et al. (2012) <sup>2</sup><br>$\lambda$ : Huber (2018) <sup>9</sup><br>$\eta$ : Huber (2018) <sup>9</sup>                         | 313.34      | 460.00  |
| R-C318             | Octafluorocyclobutane            | 115-25-3   | EOS: Platzer et al. (1990) <sup>8</sup><br>$\sigma$ : Mulero et al. (2012) <sup>2</sup><br>$\lambda$ : Huber (2018) <sup>9</sup><br>$\eta$ : Huber (2018) <sup>9</sup>                           | 267.18      | 388.38  |

| ASHRAE designation | Chemical name                                    | CAS number  | Property Sources                                                                                                                                                                                          | $T_{NBP}/K$ | $T_c/K$ |
|--------------------|--------------------------------------------------|-------------|-----------------------------------------------------------------------------------------------------------------------------------------------------------------------------------------------------------|-------------|---------|
| <b>HFOs</b>        |                                                  |             |                                                                                                                                                                                                           |             |         |
| R-1123             | Trifluoroethene                                  | 359-11-5    | EOS: Akasaka et al. (2016) <sup>38</sup><br>$\sigma$ : Huber (2018) <sup>9</sup><br>$\lambda$ : Huber (2018) <sup>9</sup><br>$\eta$ : Huber (2018) <sup>9</sup>                                           | 214.06      | 331.73  |
| R-1140             | Chloroethylene (vinyl chloride)                  | 75-01-4     | EOS: Thol (2014) <sup>39</sup><br>$\sigma$ : Huber (2018) <sup>9</sup><br>$\lambda$ : Huber (2018) <sup>9</sup><br>$\eta$ : Huber (2018) <sup>9</sup>                                                     | 259.44      | 424.96  |
| R-1216             | Hexafluoropropene                                | 116-15-4    | EOS: Zhou (2018) <sup>40</sup><br>$\sigma$ : Mulero and Cachadiña (2014) <sup>13</sup><br>$\lambda$ : Huber et al. (2003) <sup>7,*</sup><br>$\eta$ : Huber et al. (2003) <sup>7,*</sup>                   | 242.81      | 358.90  |
| R-1224yd(Z)        | (Z)-1-Chloro-2,3,3,3-tetrafluoropropene          | 111512-60-8 | EOS: Akasaka et al. (2017) <sup>41</sup><br>$\sigma$ : Huber (2018) <sup>9</sup><br>$\lambda$ : Huber (2018) <sup>9</sup><br>$\eta$ : Huber (2018) <sup>9</sup>                                           | 287.77      | 428.69  |
| R-1233zd(E)        | <i>trans</i> -1-Chloro-3,3,3-trifluoro-1-propene | 102687-65-0 | EOS: Mondejar et al. (2015) <sup>42</sup><br>$\sigma$ : Kondou et al. (2015) <sup>43</sup><br>$\lambda$ : Perkins et al. (2017) <sup>44</sup><br>$\eta$ : Huber (2018) <sup>9</sup>                       | 291.41      | 439.60  |
| R-1234yf           | 2,3,3,3-Tetrafluoroprop-1-ene                    | 754-12-1    | EOS: Richter et al. (2011) <sup>45</sup><br>$\sigma$ : Mulero et al. (2012) <sup>2</sup><br>$\lambda$ : Perkins and Huber (2011) <sup>46</sup><br>$\eta$ : Huber and Assael (2016) <sup>47</sup>          | 243.67      | 367.85  |
| R-1234ze(E)        | <i>trans</i> -1,3,3,3-Tetrafluoropropene         | 29118-24-9  | EOS: Thol and Lemmon (2016) <sup>48</sup><br>$\sigma$ : Mulero and Cachadiña (2014) <sup>13</sup><br>$\lambda$ : Perkins and Huber (2011) <sup>46</sup><br>$\eta$ : Huber and Assael (2016) <sup>47</sup> | 254.18      | 382.51  |
| R-1234ze(Z)        | <i>cis</i> -1,3,3,3-Tetrafluoropropene           | 29118-25-0  | EOS: Akasaka and Lemmon (2019) <sup>49</sup><br>$\sigma$ : Kondou et al. (2015) <sup>43</sup><br>$\lambda$ : Huber (2018) <sup>9</sup><br>$\eta$ : Huber (2018) <sup>9</sup>                              | 282.88      | 423.27  |
| R-1243zf           | 3,3,3-Trifluoropropene                           | 677-21-4    | EOS: Akasaka and Lemmon (2019) <sup>49</sup><br>$\sigma$ : Kondou et al. (2015) <sup>43</sup><br>$\lambda$ : Huber (2018) <sup>9</sup><br>$\eta$ : Huber (2018) <sup>9</sup>                              | 247.73      | 376.93  |
| R-1336mzz(Z)       | (Z)-1,1,1,4,4,4-Hexafluoro-2-butene              | 692-49-9    | EOS: McLinden and Akasaka (2020) <sup>50</sup><br>$\sigma$ : Huber (2018) <sup>9</sup><br>$\lambda$ : Huber (2018) <sup>9,**</sup><br>$\eta$ : Huber (2018) <sup>9</sup>                                  | 306.60      | 444.50  |

| ASHRAE designation  | Chemical name                              | CAS number | Property Sources                                                                                                                                                                                   | $T_{NBP}/K$ | $T_c/K$ |
|---------------------|--------------------------------------------|------------|----------------------------------------------------------------------------------------------------------------------------------------------------------------------------------------------------|-------------|---------|
| <b>hydrocarbons</b> |                                            |            |                                                                                                                                                                                                    |             |         |
| R-170               | Ethane                                     | 74-84-0    | EOS: Bücker and Wagner (2006) <sup>51</sup><br>$\sigma$ : Mulero et al. (2012) <sup>2</sup><br>$\lambda$ : Friend et al.(1991) <sup>52</sup><br>$\eta$ : Vogel et al.(2015) <sup>53</sup>          | 184.57      | 305.32  |
| R-290               | Propane                                    | 74-98-6    | EOS: Lemmon et al. (2009) <sup>54</sup><br>$\sigma$ : Mulero et al. (2012) <sup>2</sup><br>$\lambda$ : Marsh et al. (2002) <sup>55</sup><br>$\eta$ : Vogel and Herrmann (2016) <sup>56</sup>       | 231.04      | 369.89  |
| R-600               | <i>n</i> -Butane                           | 106-97-8   | EOS: Bücker and Wagner (2006) <sup>57</sup><br>$\sigma$ : Mulero et al. (2012) <sup>2</sup><br>$\lambda$ : Perkins et al. (2002) <sup>58</sup><br>$\eta$ : Herrmann and Vogel (2018) <sup>59</sup> | 272.66      | 425.13  |
| R-600a              | 2-Methylpropane (isobutane)                | 75-28-5    | EOS: Bücker and Wagner (2006) <sup>57</sup><br>$\sigma$ : Mulero et al. (2012) <sup>2</sup><br>$\lambda$ : Perkins (2002) <sup>60</sup><br>$\eta$ : Vogel et al. (2000) <sup>61</sup>              | 261.40      | 407.81  |
| R-601               | <i>n</i> -Pentane                          | 109-66-0   | EOS: Thol (2018) <sup>62</sup><br>$\sigma$ : Mulero et al. (2012) <sup>2</sup><br>$\lambda$ : Vassiliou et al. (2015) <sup>63</sup><br>$\eta$ : Huber (2018) <sup>9</sup>                          | 309.21      | 469.70  |
| R-1150              | Ethene (ethylene)                          | 74-85-1    | EOS: Smukala et al. (2000) <sup>64</sup><br>$\sigma$ : Mulero et al. (2012) <sup>2</sup><br>$\lambda$ : Assael et al. (2016) <sup>65</sup><br>$\eta$ : Holland et al. (1983) <sup>66</sup>         | 169.38      | 282.35  |
| R-1270              | Propene (propylene)                        | 115-07-1   | EOS: Lemmon (2018) <sup>67</sup><br>$\sigma$ : Mulero et al. (2012) <sup>2</sup><br>$\lambda$ : Assael et al. (2016) <sup>65</sup><br>$\eta$ : Huber (2018) <sup>9</sup>                           | 225.53      | 364.21  |
| <b>Ethers</b>       |                                            |            |                                                                                                                                                                                                    |             |         |
| R-E143a             | Methyl trifluoromethyl ether               | 421-14-7   | EOS: Akasaka and Kayukawa (2012) <sup>68</sup><br>$\sigma$ : Huber (2018) <sup>9</sup><br>$\lambda$ : Huber (2018) <sup>9</sup><br>$\eta$ : Huber (2018) <sup>9</sup>                              | 249.57      | 377.92  |
| R-E170              | Methoxymethane (dimethyl ether)            | 115-10-6   | EOS: Wu et al. (2011) <sup>69</sup><br>$\sigma$ : Mulero et al. (2012) <sup>2</sup><br>$\lambda$ : Huber (2018) <sup>9</sup><br>$\eta$ : Meng et al. (2012) <sup>70</sup>                          | 248.37      | 400.38  |
| R-E245cb2           | Methyl pentafluoroethyl-ether              | 22410-44-2 | EOS: Zhou (2018) <sup>40</sup><br>$\sigma$ : Mulero and Cachadiña (2014) <sup>13</sup><br>$\lambda$ : Huber (2018) <sup>9</sup><br>$\eta$ : Huber (2018) <sup>9</sup>                              | 278.76      | 406.81  |
| R-E245fa2           | 2,2,2-Trifluoroethyl-difluoromethyl-ether  | 1885-48-9  | EOS: Zhou (2018) <sup>40</sup><br>$\sigma$ : Mulero and Cachadiña (2014) <sup>13</sup><br>$\lambda$ : Huber (2018) <sup>9</sup><br>$\eta$ : Huber (2018) <sup>9</sup>                              | 302.40      | 444.88  |
| R-E347mcc           | 1,1,1,2,2,3,3-Heptafluoro-3-methoxypropane | 375-03-1   | EOS: Zhou (2018) <sup>40</sup><br>$\sigma$ : Mulero and Cachadiña (2014) <sup>13</sup><br>$\lambda$ : Huber (2018) <sup>9</sup><br>$\eta$ : Huber (2018) <sup>9</sup>                              | 307.33      | 437.70  |

| ASHRAE designation | Chemical name                                                            | CAS number | Property Sources                                                                                                                                                                               | $T_{NBP}/K$ | $T_c/K$ |
|--------------------|--------------------------------------------------------------------------|------------|------------------------------------------------------------------------------------------------------------------------------------------------------------------------------------------------|-------------|---------|
| n.a.               | 1,1,1,2,2,4,5,5,5-Nonafluoro-4-(trifluoromethyl)-3-pentanone (Novec 649) | 756-13-8   | EOS: McLinden et al. (2015) <sup>71</sup><br>$\sigma$ : Cui et al. (2018) <sup>72</sup><br>$\lambda$ : Perkins et al. (2018) <sup>73</sup><br>$\eta$ : Wen et al. (2017) <sup>74</sup>         | 322.20      | 441.81  |
| <b>other</b>       |                                                                          |            |                                                                                                                                                                                                |             |         |
| R-1311             | Trifluoroiodomethane                                                     | 2314-97-8  | EOS: Lemmon and Span (2015) <sup>10</sup><br>$\sigma$ : Mulero et al. (2012) <sup>2</sup><br>$\lambda$ : Huber (2018) <sup>9</sup><br>$\eta$ : Huber (2018) <sup>9</sup>                       | 251.29      | 396.44  |
| R-717              | Ammonia                                                                  | 7664-41-7  | EOS: Gao (2018) <sup>75</sup><br>$\sigma$ : Mulero et al. (2012) <sup>2</sup><br>$\lambda$ : Monogenidou et al. (2018) <sup>76</sup><br>$\eta$ : Monogenidou et al. (2018) <sup>77</sup>       | 239.83      | 405.56  |
| R-718              | Water                                                                    | 7732-18-5  | EOS: Wagner and Pruß (2002) <sup>78</sup><br>$\sigma$ : IAPWS (2014) <sup>79</sup><br>$\lambda$ : Huber et al. (2012) <sup>80</sup><br>$\eta$ : Huber et al. (2009) <sup>81</sup>              | 373.12      | 647.10  |
| R-744              | Carbon dioxide                                                           | 124-38-9   | EOS: Span and Wagner (1996) <sup>82</sup><br>$\sigma$ : Mulero et al. (2012) <sup>2</sup><br>$\lambda$ : Huber et al. (2016) <sup>83</sup><br>$\eta$ : Laesecke and Muzny (2017) <sup>84</sup> | 194.69      | 304.13  |
| R-764              | Sulfur dioxide                                                           | 7446-09-5  | EOS: Gao et al. (2016) <sup>85</sup><br>$\sigma$ : Mulero et al. (2012) <sup>2</sup><br>$\lambda$ : Huber (2018) <sup>9</sup><br>$\eta$ : Huber (2018) <sup>9</sup>                            | 263.14      | 430.64  |

\*Coefficients are in Ref.<sup>86</sup> using method described in Ref.<sup>7</sup> \*\*Now superceded by Ref.<sup>87</sup>

## REFERENCES

1. Jacobsen, R. T.; Penoncello, S. G.; Lemmon, E. W., A fundamental equation for trichlorofluoromethane (R-11). *Fluid Phase Equilib.* **1992**, *80*, 45-56.
2. Mulero, A.; Cachadiña, I.; Parra, M. I., Recommended correlations for the surface tension of common fluids. *J. Phys. Chem. Ref. Data* **2012**, *41*, 043105.
3. McLinden, M. O.; Klein, S. A.; Perkins, R. A., An extended corresponding states model for the thermal conductivity of refrigerants and refrigerant mixtures. *Int. J. Refrig.* **2000**, *23*, 43-63.
4. Klein, S. A.; McLinden, M. O.; Laesecke, A., An improved extended corresponding states method for the estimation of viscosity of pure refrigerants and mixtures. *Int. J. Refrig.* **1997**, *20*, 208-217.
5. Marx, V.; Pruss, A.; Wagner, W., Neue Zustandsgleichungen für R 12, R 22, R 11 und R 113. Beschreibung des thermodynamischen Zustandsverhaltens bei Temperaturen bis 525 K und Druecken bis 200 MPa, Duesseldorf, VDI Verlag, Series 19 (Waermetechnik/ Kaeltechnik), No. 57, 1992.
6. Magee, J. W.; Outcalt, S. L.; Ely, J. F., Molar heat capacity  $C_v$ , vapor pressure, and  $(p, \rho, T)$  measurements from 92 to 350 K at pressures to 35 MPa and a new equation of state for chlorotrifluoromethane (R13). *Int. J. Thermophys.* **2000**, *21*, 1097-1121.
7. Huber, M. L.; Laesecke, A.; Perkins, R. A., Model for the viscosity and thermal conductivity of refrigerants, including a new correlation for the viscosity of R134a. *Ind. Eng. Chem. Res.* **2003**, *42*, 3163-3178.
8. Platzer, B.; Polt, A.; Maurer, G., *Thermophysical Properties of Refrigerants*. Springer-Verlag: Berlin, 1990.
9. Huber, M. L., Models for the viscosity, thermal conductivity, and surface tension of selected pure fluids as implemented in REFPROP v10.0, NISTIR 8209, 2018. doi: 10.6028/NIST.IR.8209.
10. Lemmon, E. W.; Span, R., Thermodynamic properties of R-227ea, R-365mfc, R-115, and R-1311. *J. Chem. Eng. Data* **2015**, *60*, 3745-3758.
11. Kamei, A.; Beyerlein, S. W.; Jacobsen, R. T., Application of nonlinear regression in the development of a wide range formulation for HCFC-22. *Int. J. Thermophys.* **1995**, *16*, 1155-1164.
12. Thol, M.; Piazza, L.; Span, R., A new functional form for equations of state for some weakly associating fluids. *Int. J. Thermophys.* **2014**, *35*, 783-811.
13. Mulero, A.; Cachadiña, I., Recommended correlations for the surface tension of several fluids included in the REFPROP program. *J. Phys. Chem. Ref. Data* **2014**, *43*, 023104.
14. Younglove, B. A.; McLinden, M. O., An international standard equation of state for the thermodynamic properties of refrigerant 123 (2,2-Dichloro-1,1,1-Trifluoroethane). *J. Phys. Chem. Ref. Data* **1994**, *23*, 731-779.
15. Laesecke, A.; Perkins, R. A.; Howley, J. B., An improved correlation for the thermal conductivity of HCFC123 (2,2-dichloro-1,1,1-trifluoroethane). *Int. J. Refrig.* **1996**, *19*, 231-238.
16. Tanaka, Y.; Sotani, T., Thermal conductivity and viscosity of 2,2-dichloro-1,1,1-trifluoroethane (HCFC-123). *Int. J. Thermophys.* **1996**, *17*, 293-328.

17. de Vries, B.; Tillner-Roth, R.; Baehr, H. D., Thermodynamic properties of HCFC 124, 19th International Congress of Refrigeration, The Hague, The Netherlands, International Institute of Refrigeration, IVa:582-589, 1995.
18. Lemmon, E. W.; Span, R., Short fundamental equations of state for 20 industrial fluids. *J. Chem. Eng. Data* **2006**, *51*, 785-850.
19. Thol, M.; Koeste, A.; Rutkai, G.; Span, R.; Wagner, W.; Vrabec, J., Equation of state for dichloroethane based on a hybrid data set. *Mol. Phys.* **2017**, *115*, 1166-1185.
20. Penoncello, S. G.; Lemmon, E. W.; Jacobsen, R. T.; Shan, Z. J., A fundamental equation for trifluoromethane (R-23). *J. Phys. Chem. Ref. Data* **2003**, *32*, 1473-1499.
21. Shan, Z.; Penoncello, S. G.; Jacobsen, R. T., A generalized model for viscosity and thermal conductivity of trifluoromethane (R-23). *ASHRAE Trans.* **2000**, *106*, 757-767.
22. Tillner-Roth, R.; Yokozeki, A., An international standard equation of state for difluoromethane (R-32) for temperatures from the triple point at 136.34 K to 435 K and pressures up to 70 MPa. *J. Phys. Chem. Ref. Data* **1997**, *26*, 1273-1328.
23. Lemmon, E. W.; Jacobsen, R. T., A new functional form and new fitting techniques for equations of state with application to pentafluoroethane (HFC-125). *J. Phys. Chem. Ref. Data* **2005**, *34*, 69-108.
24. Perkins, R. A.; Huber, M. L., Measurement and correlation of the thermal conductivity of pentafluoroethane (R125) from 190 K to 512 K at pressures to 70 MPa. *J. Chem. Eng. Data* **2006**, *51*, 898-904.
25. Huber, M. L.; Laesecke, A., Correlation for the viscosity of pentafluoroethane (R125) from the triple point to 500 K at pressures up to 60 MPa. *Ind. Eng. Chem. Res.* **2006**, *45*, 4447-4453.
26. Tillner-Roth, R.; Baehr, H. D., An international standard formulation of the thermodynamic properties of 1,1,1,2-tetrafluoroethane (HFC-134a) for temperatures from 170 K to 455 K at pressures up to 70 MPa. *J. Phys. Chem. Ref. Data* **1994**, *23*, 657-729.
27. Perkins, R. A.; Laesecke, A.; Howley, J. B.; Ramires, M. L. V.; Gurova, A. N.; Cusco, L., Experimental thermal conductivity values for the IUPAC round-robin sample of 1,1,1,2-tetrafluoroethane (R134a), NISTIR, 2000.
28. Lemmon, E. W.; Jacobsen, R. T., An international standard formulation for the thermodynamic properties of 1,1,1-trifluoroethane (HFC-143a) for temperatures from 161 to 450 K and pressures to 50 MPa. *J. Phys. Chem. Ref. Data* **2000**, *29*, 521-552.
29. Outcalt, S. L.; McLinden, M. O., A modified Benedict-Webb-Rubin equation of state for the thermodynamic properties of R152a (1,1-difluoroethane). *J. Phys. Chem. Ref. Data* **1996**, *25*, 605-636.
30. Krauss, R.; Weiss, V. C.; Edison, T. A.; Sengers, J. V.; Stephan, K., Transport properties of 1,1-difluoroethane (R152a). *Int. J. Thermophys.* **1996**, *17*, 731-757.
31. Qi, H. Y.; Fang, D.; Gao, K. H.; Meng, X. Y.; Wu, J. T., Compressed liquid densities and Helmholtz energy equation of state for fluoroethane (R161). *Int. J. Thermophys.* **2016**, *37*, 55.
32. Tsolakidou, C. M.; Assael, M. J.; Huber, M. L.; Perkins, R. A., Correlations for the viscosity and thermal conductivity of ethyl fluoride (R161). *J. Phys. Chem. Ref. Data* **2017**, *46*, 023103.
33. Rui, X. F.; Pan, J.; Wang, Y. G., An equation of state for the thermodynamic properties of 1,1,1,2,3,3-hexafluoropropane (R236ea). *Fluid Phase Equilib.* **2013**, *341*, 75-85.



34. Pan, J.; Rui, X. F.; Zhao, X. D.; Qiu, L. M., An equation of state for the thermodynamic properties of 1,1,1,3,3,3-hexafluoropropane (HFC-236fa). *Fluid Phase Equilib.* **2012**, *321*, 10-16.
35. Zhou, Y.; Lemmon, E. W., Equation of state for the thermodynamic properties of 1,1,2,2,3-pentafluoropropane (R-245ca). *Int. J. Thermophys.* **2016**, *37*, 27.
36. Akasaka, R.; Zhou, Y.; Lemmon, E. W., A fundamental equation of state for 1,1,1,3,3-pentafluoropropane (R-245fa). *J. Phys. Chem. Ref. Data* **2015**, *44*, 013104.
37. Perkins, R. A.; Huber, M. L.; Assael, M. J., Measurements of the thermal conductivity of 1,1,1,3,3-Pentafluoropropane (R245fa) and correlations for the viscosity and thermal conductivity surfaces. *J. Chem. Eng. Data* **2016**, *61*, 3286-3294.
38. Akasaka, R.; Fukushima, M.; Lemmon, E. W., A Helmholtz energy equation of state for trifluoroethylene (R-1123), International Refrigeration and Air Conditioning Conference at Purdue, July 11-14, 2016.
39. Thol, M., Ruhr-Univ. Bochum, Germany, Helmholtz equation of state for vinyl chloride. **2014**.
40. Zhou, Y., Xi'an Xiaotong Univ., China, Equations of state for RE245cb2, RE347mcc, RE245fa2, and R1216. **2018**.
41. Akasaka, R.; Fukushima, M.; Lemmon, E. W., A Helmholtz energy equation of state for cis-1-chloro-2,3,3,3-tetrafluoropropene (R-1224yd(Z)), European Conference on Thermophysical Properties, Graz, Austria, September 3-8, 2017.
42. Mondejar, M. E.; McLinden, M. O.; Lemmon, E. W., Thermodynamic properties of *trans*-1-chloro-3,3,3-trifluoropropene (R1233zd(E)): Vapor pressure, ( $p$ ,  $\rho$ ,  $T$ ) behavior, and speed of sound measurements, and equation of state. *J. Chem. Eng. Data* **2015**, *60*, 2477-2489.
43. Kondou, C.; Nagata, R.; Nii, N.; Koyama, S.; Higashi, Y., Surface tension of low GWP refrigerants R1243zf, R1234ze(Z), and R1233zd(E). *Int. J. Refrig.* **2015**, *53*, 80-89.
44. Perkins, R. A.; Huber, M. L.; Assael, M. J., Measurement and correlation of the thermal conductivity of *trans*-1-chloro-3,3,3-trifluoropropene (R1233zd(E)). *J. Chem. Eng. Data* **2017**, *62*, 2659-2665.
45. Richter, M.; McLinden, M. O.; Lemmon, E. W., Thermodynamic properties of 2,3,3,3-tetrafluoroprop-1-ene (R1234yf): Vapor pressure and  $p$ - $\rho$ - $T$  measurements and an equation of state. *J. Chem. Eng. Data* **2011**, *56*, 3254-3264.
46. Perkins, R. A.; Huber, M. L., Measurement and correlation of the thermal conductivity of 2,3,3,3-tetrafluoroprop-1-ene (R1234yf) and *trans*-1,3,3,3-tetrafluoropropene (R1234ze(E)). *J. Chem. Eng. Data* **2011**, *56*, 4868-4874.
47. Huber, M. L.; Assael, M. J., Correlations for the viscosity of 2,3,3,3-tetrafluoroprop-1-ene (R1234yf) and *trans*-1,3,3,3-tetrafluoropropene (R1234ze(E)). *Int. J. Refrig.* **2016**, *71*, 39-45.
48. Thol, M.; Lemmon, E. W., Equation of state for the thermodynamic properties of *trans*-1,3,3,3-tetrafluoropropene R-1234ze(E). *Int. J. Thermophys.* **2016**, *37*, 28.
49. Akasaka, R.; Lemmon, E. W., Fundamental equations of state for *cis*-1,3,3,3-tetrafluoropropene R-1234ze(Z) and 3,3,3-trifluoropropene (R-1243zf). *J. Chem. Eng. Data* **2019**, *64*, 4679-4691.
50. McLinden, M. O.; Akasaka, R., Thermodynamic properties of *cis*-1,1,1,4,4,4-hexafluorobutene [R-1336mzz(Z)]: Vapor pressure, ( $p$ ,  $\rho$ ,  $T$ ) behavior, and speed of sound measurements and equation of state. *J. Chem. Eng. Data* **2020** (in press, doi 10.1021/acs.jced.9b01198).

51. Bücker, D.; Wagner, W., A reference equation of state for the thermodynamic properties of ethane for temperatures from the melting line to 675 K and pressures up to 900 MPa. *J. Phys. Chem. Ref. Data* **2006**, *35*, 205-266.
52. Friend, D. G.; Ingham, H.; Ely, J. F., Thermophysical properties of ethane. *J. Phys. Chem. Ref. Data* **1991**, *20*, 275-347.
53. Vogel, E.; Span, R.; Herrmann, S., Reference correlation for the viscosity of ethane. *J. Phys. Chem. Ref. Data* **2015**, *44*, 043101.
54. Lemmon, E. W.; McLinden, M. O.; Wagner, W., Thermodynamic properties of propane. III. A reference equation of state for temperatures from the melting line to 650 K and pressures up to 1000 MPa. *J. Chem. Eng. Data* **2009**, *54*, 3141-3180.
55. Marsh, K. N.; Perkins, R. A.; Ramires, M. L. V., Measurement and correlation of the thermal conductivity of propane. *J. Chem. Eng. Data* **2002**, *47*, 932-940.
56. Vogel, E.; Herrmann, S., New formulation for the viscosity of propane. *J. Phys. Chem. Ref. Data* **2016**, *45*, 043103.
57. Bücker, D.; Wagner, W., Reference equations of state for the thermodynamic properties of fluid phase n-butane and isobutane. *J. Phys. Chem. Ref. Data* **2006**, *35*, 929-1019.
58. Perkins, R. A.; Ramires, M. L. V.; Nieto de Castro, C. A.; Cusco, L., Measurement and correlation of the thermal conductivity of butane from 135 K to 600 K at pressures to 70 MPa. *J. Chem. Eng. Data* **2002**, *47*, 1263-1271.
59. Herrmann, S.; Vogel, E., New formulation for the viscosity of n-butane. *J. Phys. Chem. Ref. Data* **2018**, *47*, 013104.
60. Perkins, R. A., Measurement and correlation of the thermal conductivity of isobutane from 114 K to 600 K at pressures to 70 MPa. *J. Chem. Eng. Data* **2002**, *47*, 1272-1279.
61. Vogel, E.; Kuchenmeister, C.; Bich, E., Viscosity correlation for isobutane over wide ranges of the fluid region. *Int. J. Thermophys.* **2000**, *21*, 343-356.
62. Thol, M., Ruhr-Univ. Bochum, Germany, Fundamental equations of state for hydrocarbons. Part I. n-Pentane. 2018.
63. Vassiliou, C. M.; Assael, M. J.; Huber, M. L.; Perkins, R. A., Reference correlations of the thermal conductivity of cyclopentane, iso-pentane, and n-pentane. *J. Phys. Chem. Ref. Data* **2015**, *44*, 033102.
64. Smukula, J.; Span, R.; Wagner, W., A new equation of state for ethylene covering the fluid region for temperatures from the melting line to 450 K at pressures up to 300 MPa. *J. Phys. Chem. Ref. Data* **2000**, *29*, 1052-1122.
65. Assael, M. J.; Koutian, A.; Huber, M. L.; Perkins, R. A., Reference correlations of the thermal conductivity of ethene and propene. *J. Phys. Chem. Ref. Data* **2016**, *45*, 033104.
66. Holland, P. M.; Eaton, B. E.; Hanley, H. J. M., A correlation of the viscosity and thermal conductivity data of gaseous and liquid Ethylene. *J. Phys. Chem. Ref. Data* **1983**, *12*, 917-932.
67. Lemmon, E. W., NIST, Boulder, USA, A reference equation of state for propylene for temperatures from the melting line to 575 K and pressures up to 1000 MPa. 2018.
68. Akasaka, R.; Kayukawa, Y., A fundamental equation of state for trifluoromethyl methyl ether (HFE-143m) and its application to refrigeration cycle analysis. *Int. J. Refrig.* **2012**, *35*, 1003-1013.
69. Wu, J. T.; Zhou, Y.; Lemmon, E. W., An equation of state for the thermodynamic properties of dimethyl ether. *J. Phys. Chem. Ref. Data* **2011**, *40*, 023104.

70. Meng, X. Y.; Zhang, J. B.; Wu, J. T.; Liu, Z. G., Experimental measurement and modeling of the viscosity of dimethyl ether. *J. Chem. Eng. Data* **2012**, *57*, 988-993.
71. McLinden, M. O.; Perkins, R. A.; Lemmon, E. W.; Fortin, T. J., Thermodynamic properties of 1,1,1,2,2,4,5,5,5-nonafluoro-4-(trifluoromethyl)-3-pentanone: Vapor pressure, ( $p$ ,  $\rho$ ,  $T$ ) behavior, and speed of sound measurements, and an equation of state. *J. Chem. Eng. Data* **2015**, *60*, 3646-3659.
72. Cui, J. W.; Yan, S. M.; Bi, S. S.; Wu, J. T., Saturated liquid dynamic viscosity and surface tension of trans-1-chloro-3,3,3-trifluoropropene and dodecafluoro-2-methylpentan-3-one. *J. Chem. Eng. Data* **2018**, *63*, 751-756.
73. Perkins, R. A.; Huber, M. L.; Assael, M. J., Measurement and correlation of the thermal conductivity of 1,1,1,2,2,4,5,5,5-nonafluoro-4-(trifluoromethyl)-3-pentanone. *J. Chem. Eng. Data* **2018**, *63*, 2783-2789.
74. Wen, C. Y.; Meng, X. Y.; Huber, M. L.; Wu, J. T., Measurement and correlation of the viscosity of 1,1,1,2,2,4,5,5,5-nonafluoro-4-(trifluoromethyl)-3-pentanone. *J. Chem. Eng. Data* **2017**, *62*, 3603-3609.
75. Gao, K. H., Xi'an Xiaotong Univ., China, Thermodynamic properties of ammonia for temperatures from the melting line to 725 K and pressures to 1000 MPa. 2018.
76. Monogenidou, S. A.; Assael, M. J.; Huber, M. L., Reference correlation for the thermal conductivity of ammonia from the triple-point temperature to 680 K and pressures up to 80 MPa. *J. Phys. Chem. Ref. Data* **2018**, *47*, 023102.
77. Monogenidou, S. A.; Assael, M. J.; Huber, M. L., Reference correlation for the viscosity of ammonia from the triple point to 725 K and up to 50 MPa. *J. Phys. Chem. Ref. Data* **2018**, *47*, 043101.
78. Wagner, W.; Pruß, A., The IAPWS formulation 1995 for the thermodynamic properties of ordinary water substance for general and scientific use. *J. Phys. Chem. Ref. Data* **2002**, *31*, 387-535.
79. IAPWS, International Association for the Properties of Water and Steam, Revised Release on Surface Tension of Ordinary Water Substance, IAPWS R1-76(2014), June 2014. <http://www.iapws.org/relguide/Surf-H2O.html>. 2014.
80. Huber, M. L.; Perkins, R. A.; Friend, D. G.; Sengers, J. V.; Assael, M. J.; Metaxa, I. N.; Miyagawa, K.; Hellmann, R.; Vogel, E., New international formulation for the thermal conductivity of H<sub>2</sub>O. *J. Phys. Chem. Ref. Data* **2012**, *41*, 033102.
81. Huber, M. L.; Perkins, R. A.; Laesecke, A.; Friend, D. G.; Sengers, J. V.; Assael, M. J.; Metaxa, I. N.; Vogel, E.; Mareš, R.; Miyagawa, K., New international formulation for the viscosity of H<sub>2</sub>O. *J. Phys. Chem. Ref. Data* **2009**, *38*, 101-125.
82. Span, R.; Wagner, W., A new equation of state for carbon dioxide covering the fluid region from the triple-point temperature to 1100 K at pressures up to 800 MPa. *J. Phys. Chem. Ref. Data* **1996**, *25*, 1509-1596.
83. Huber, M. L.; Sykioti, E. A.; Assael, M. J.; Perkins, R. A., Reference correlation of the thermal conductivity of carbon dioxide from the triple point to 1100 K and up to 200 MPa. *J. Phys. Chem. Ref. Data* **2016**, *45*, 013102.
84. Laesecke, A.; Muzny, C. D., Reference correlation for the viscosity of carbon dioxide. *J. Phys. Chem. Ref. Data* **2017**, *46*, 013107.
85. Gao, K. H.; Wu, J. T.; Zhang, P. G.; Lemmon, E. W., A Helmholtz energy equation of state for sulfur dioxide. *J. Chem. Eng. Data* **2016**, *61*, 2859-2872.

86. Lemmon, E. W.; Bell, I. H.; Huber, M. L.; McLinden, M. O. *NIST Standard Reference Database 23, NIST Reference Fluid Thermodynamic and Transport Properties, version 10.0*, Standard Reference Data Program, National Institute of Standards and Technology, Gaithersburg, MD, <https://www.nist.gov/srd/refprop>, 2018
87. Perkins, R.A.; Huber, M.L., Measurement and correlation of the thermal conductivity of cis-1,1,1,4,4,4-hexafluoro-2-butene. *Int. J. Thermophys.* **2020**, 41, 103.
